# Supplementary material for: In silicodesign of a lipid-like compound targeting KRAS4B-G12D through non-covalent bonds
Source: Royal Society of Chemistry journal article supplement (doi:10.1039/d3nr04513g), 2023-01-01
Supplement: d3nr04513g3.pdf [file d3nr04513g3.pdf]

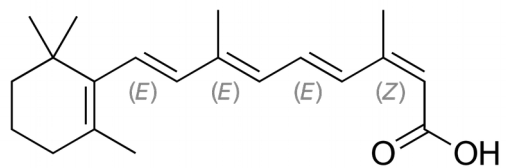

Isotretinoin

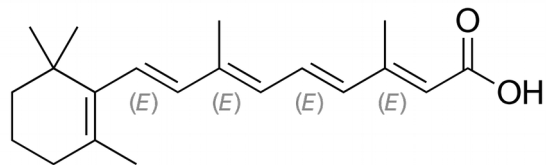

Tretinoin

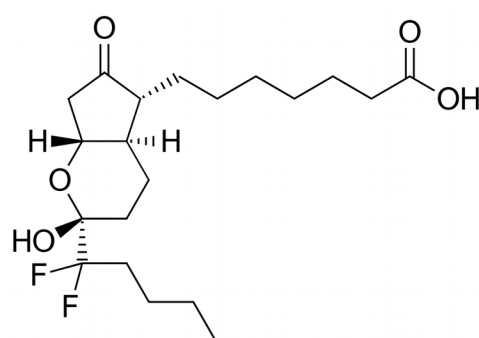

Lubiprostone

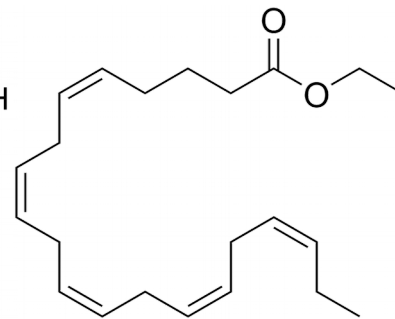

Omega-3 acid  
ethyl esters

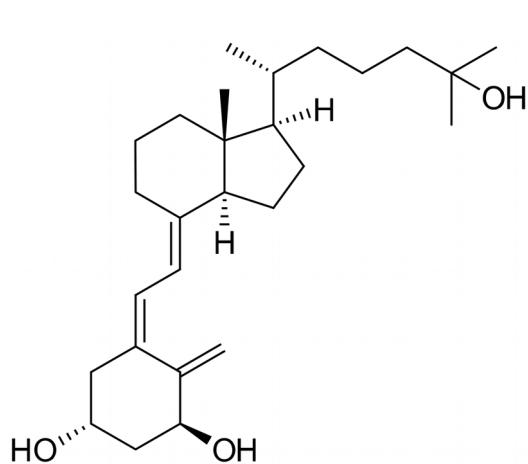

Calcitriol

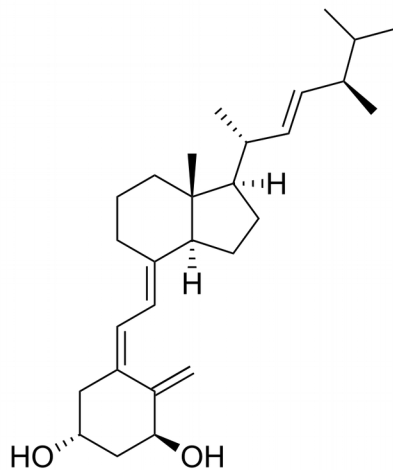

Doxercalciferol

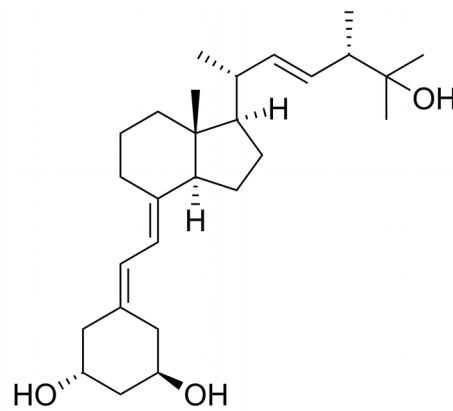

Paricalcitol

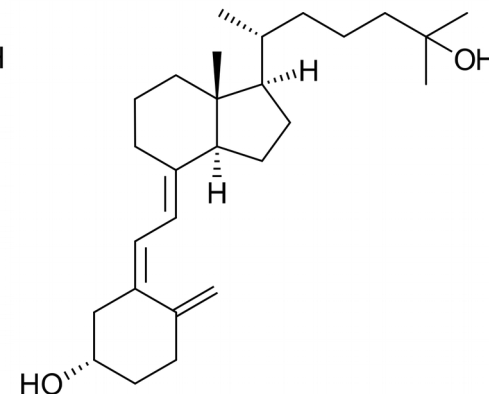

Calcifediol
