# Supplementary material for: In silicodesign of a lipid-like compound targeting KRAS4B-G12D through non-covalent bonds
Source: Royal Society of Chemistry journal article supplement (doi:10.1039/d3nr04513g), 2023-01-01
Supplement: d3nr04513g4.pdf [file d3nr04513g4.pdf]

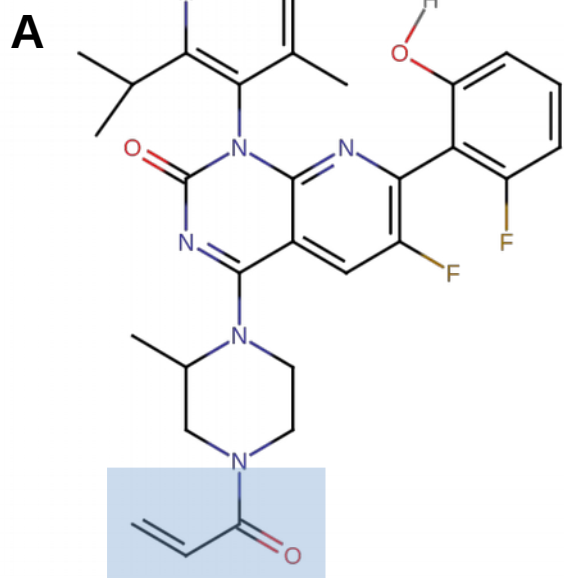

AMG510

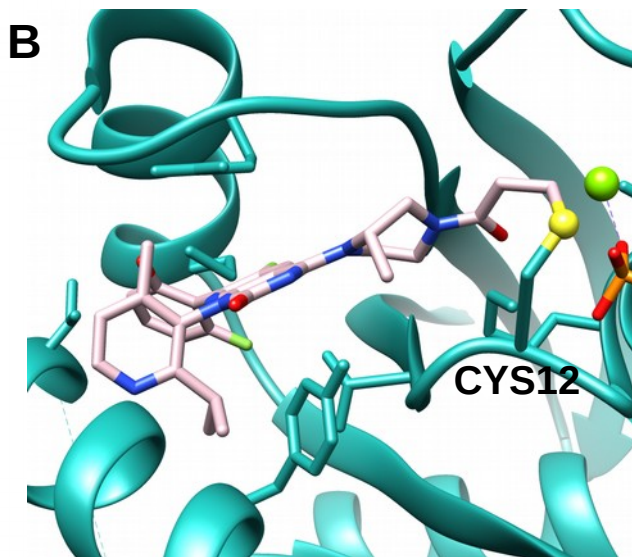

KRas G12C inhibitor, PDB: 6OIM

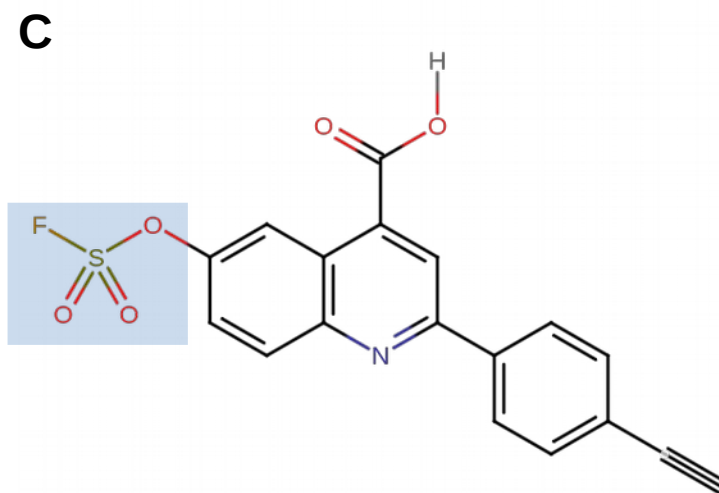

Aryl fluorosulfate probe

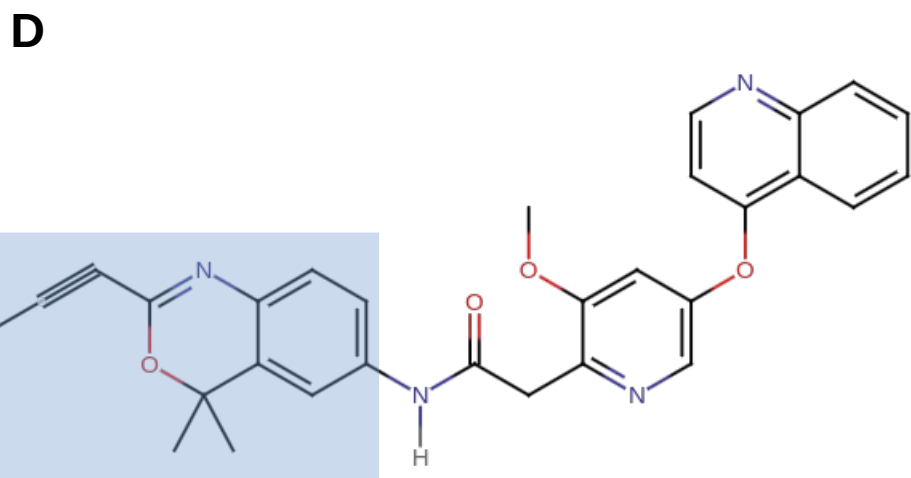

c-KIT covalent inhibitor, PDB: 6XVB

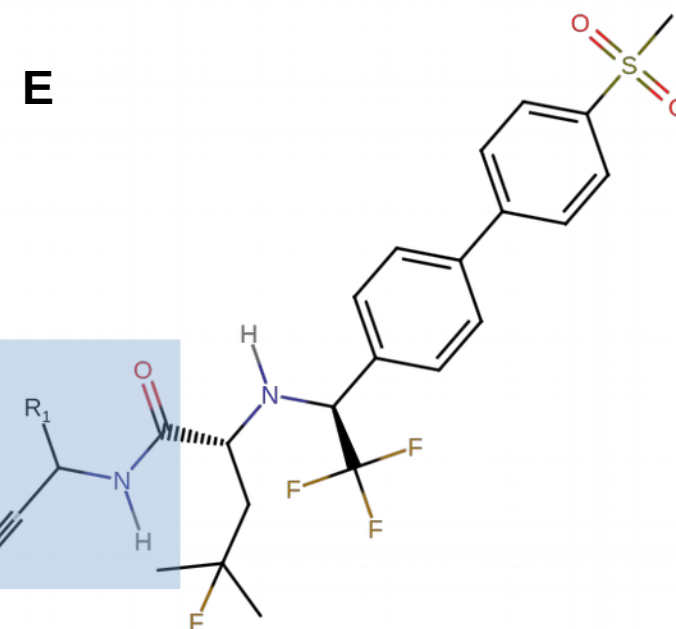

Covalent CatK inhibitor
