# Supplementary figures and images for: In silicodesign of a lipid-like compound targeting KRAS4B-G12D through non-covalent bonds
Source: Royal Society of Chemistry journal article supplement (doi:10.1039/d3nr04513g), 2023-01-01

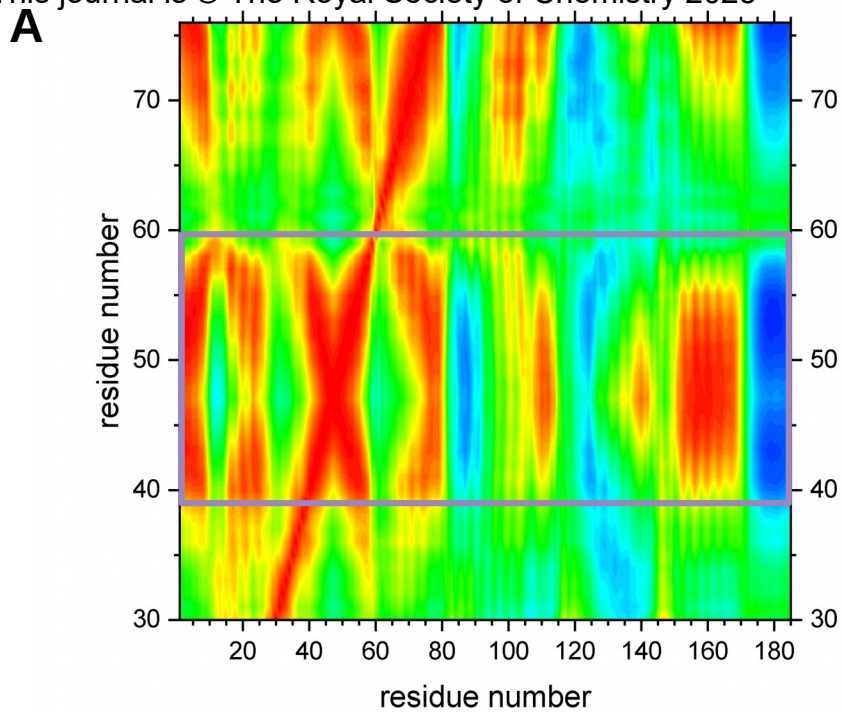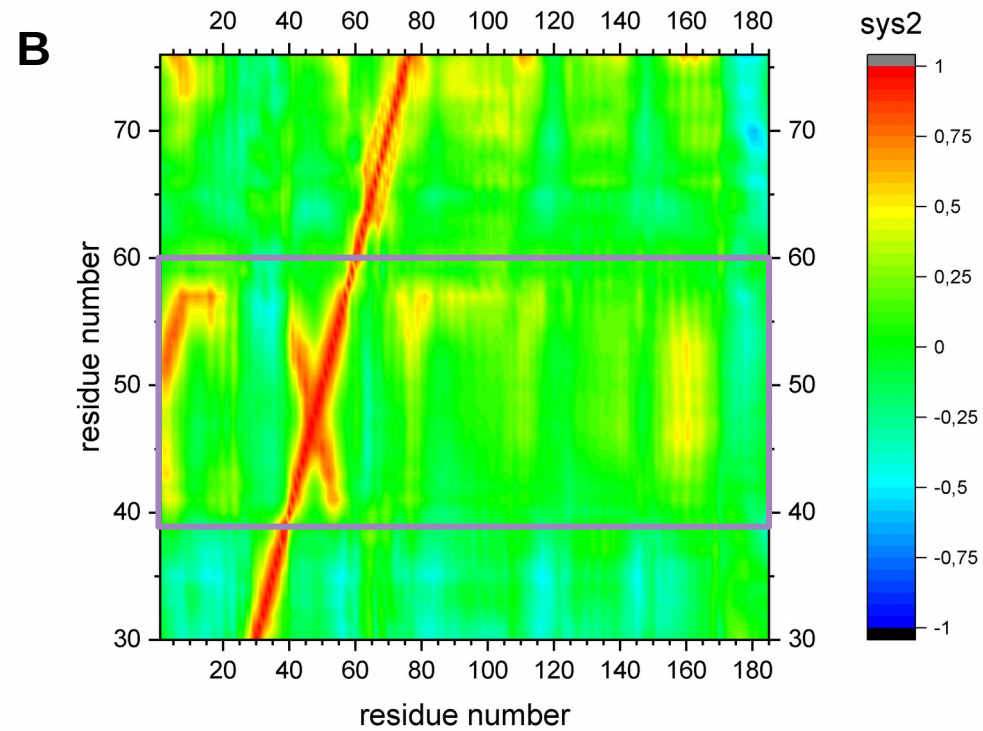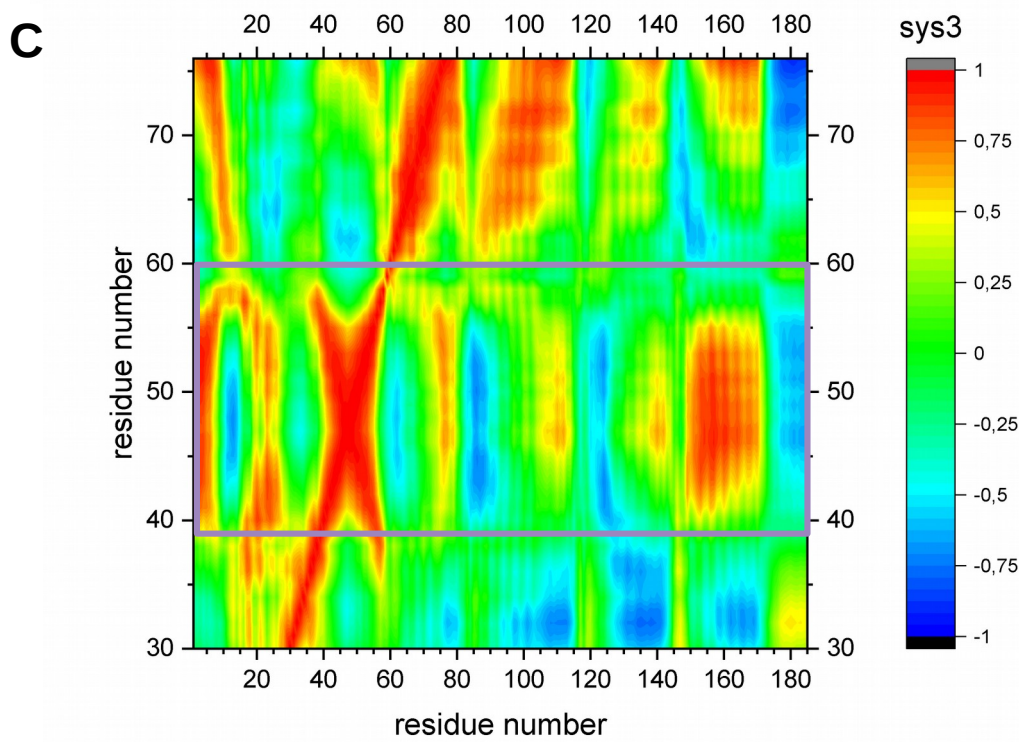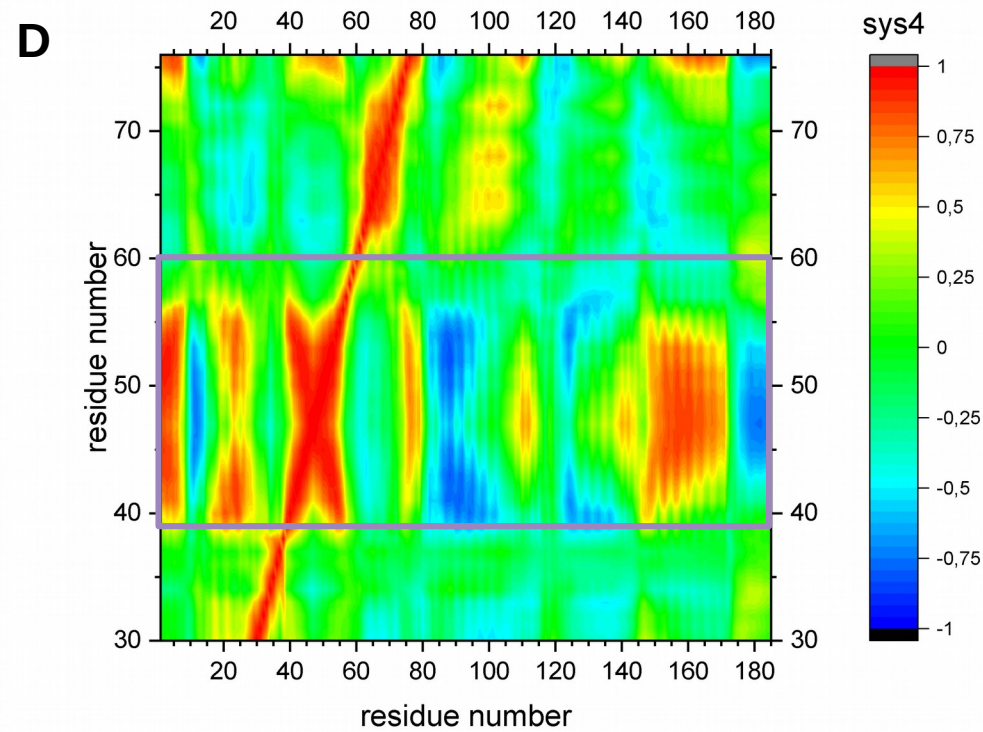

Supplement: d3nr04513g1.pdf [file d3nr04513g1.pdf]

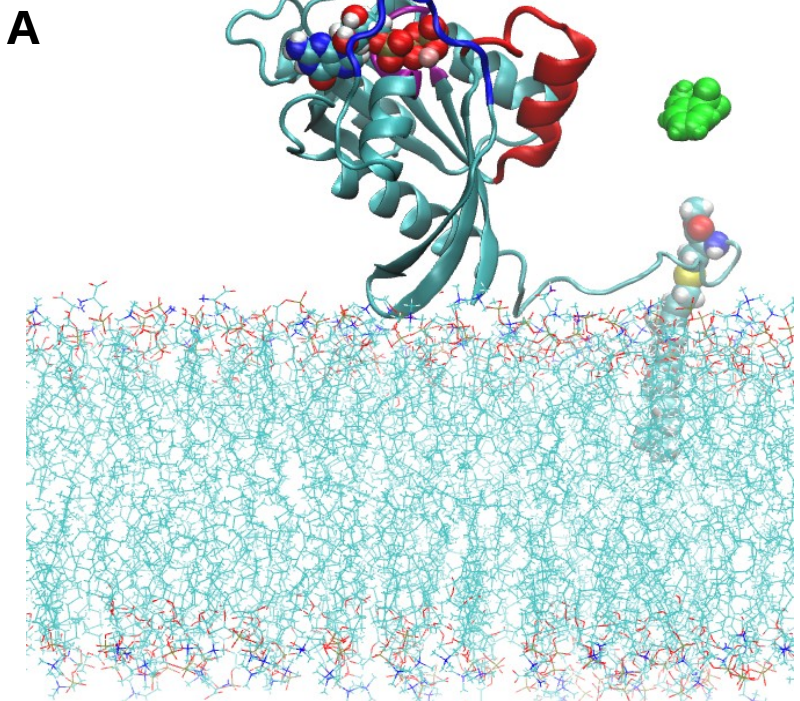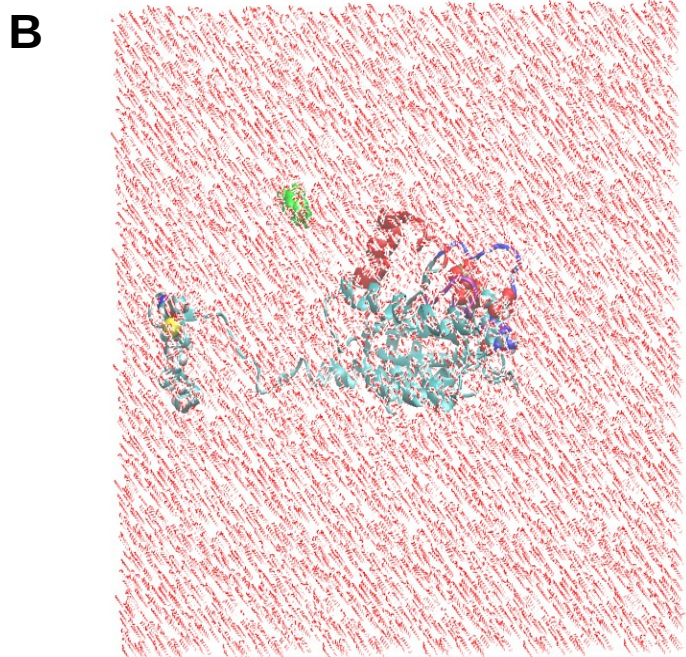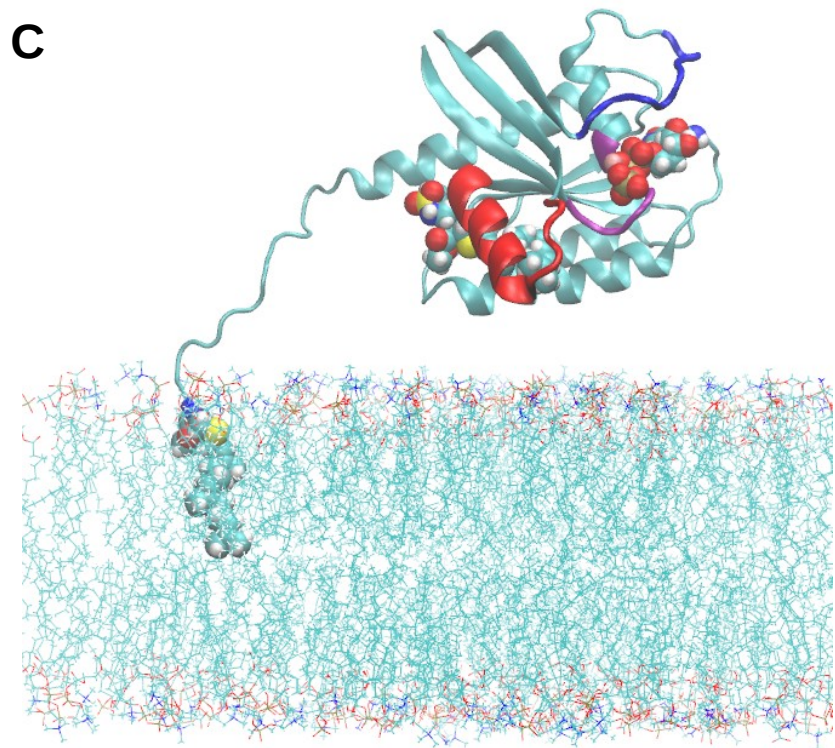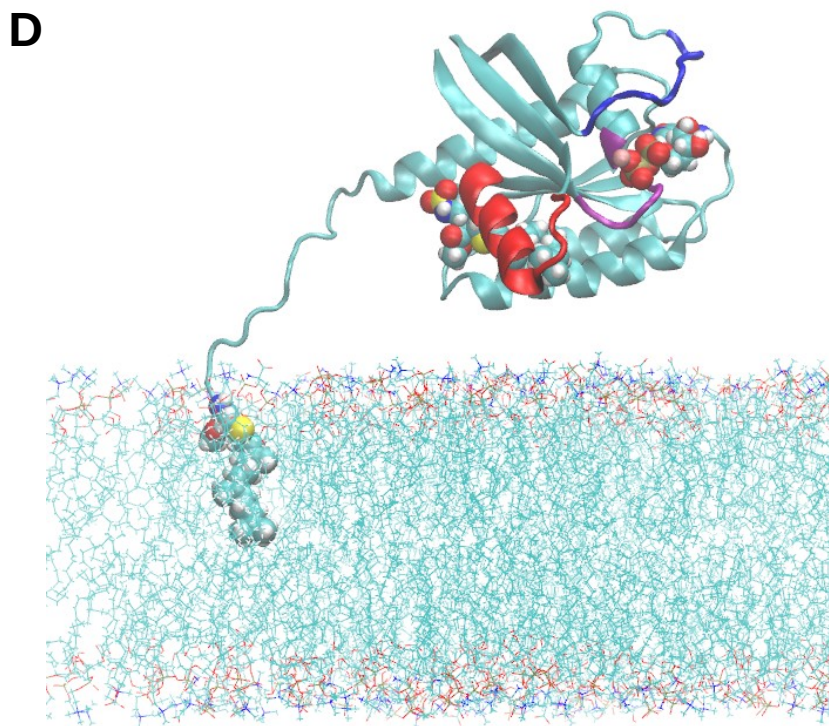

Supplement: d3nr04513g2.pdf [file d3nr04513g2.pdf]
